# Supplementary material
Source: Research Square preprint supplement (doi:10.21203/rs.3.rs-10004447/v1)
Supplement: Supplementary file 1 [file 8de4058c48a68ce33a2770a5.docx]

Appendix 1 Physicochemical properties and subcellular localization analysis of CcCYP450 proteins

| Gene name | Gene ID | Amino acids（aa） | Molecular weight（Da） | Theoretical isoelectric point | Unstability coefficient | Aliphatic coefficient | Hydrophilicity | Subcellular localization prediction |
| --- | --- | --- | --- | --- | --- | --- | --- | --- |
| CcCYP76C1 | IMPTCCH1N65630_1 | 486 | 54609.65 | 7.1 | 42.53 | 103.7 | 0.001 | golg |
| CcCYP78A1 | IMPTCCH1N5535_1 | 283 | 32326.44 | 6.56 | 27.13 | 90.85 | -0.093 | chlo |
| CcCYP78A2 | IMPTCCH1N32715_1 | 293 | 33893.44 | 5.13 | 23.27 | 102.63 | 0.15 | cyto |
| CcCYP78A3 | IMPTCCH1N4714_1 | 523 | 58439.9 | 6.52 | 36.6 | 96.71 | 0.141 | chlo |
| CcCYP78A4 | IMPTCCH1N11952_1 | 205 | 22888.37 | 4.89 | 30.71 | 104.15 | 0.033 | cyto |
| CcCYP78A5 | IMPTCCH1N946_1 | 523 | 58425.93 | 7.68 | 38.29 | 95.24 | 0.117 | chlo |
| CcCYP78A6 | IMPTCCH1N16219_1 | 515 | 58800.71 | 8.72 | 43.04 | 97.71 | 0.066 | chlo |
| CcCYP98A1 | IMPTCCH1N33784_1 | 509 | 58086.26 | 8.51 | 39.38 | 93.85 | -0.22 | chlo |
| CcCYP707A1 | IMPTCCH1N1880_1 | 478 | 54435.51 | 9.27 | 53.66 | 91 | -0.081 | chlo |
| CcCYP707A2 | IMPTCCH1N31840_1 | 425 | 48033.67 | 5.69 | 40.38 | 91.53 | -0.244 | chlo |
| CcCYP707A3 | IMPTCCH1N104557_1 | 475 | 53897.44 | 9.2 | 43.98 | 89.12 | -0.187 | chlo |
| CcCYP707A4 | IMPTCCH1N13592_1 | 633 | 72275.26 | 7.95 | 37.8 | 82.29 | -0.376 | chlo |
| CcCYP707A5 | IMPTCCH1N36134_1 | 445 | 50819.82 | 9.35 | 49.98 | 87.84 | -0.313 | cyto |
| Gene name | Gene ID | Amino acids（aa） | Molecular weight（Da） | Theoretical isoelectric point | Unstability coefficient | Aliphatic coefficient | Hydrophilicity | Subcellular localization prediction |
| CcCYP90A1 | IMPTCCH1N73163_1 | 477 | 54240.41 | 8.9 | 38.82 | 92.58 | -0.03 | vacu |
| CcCYP87A1 | IMPTCCH1N45474_1 | 190 | 21211.59 | 9.63 | 45.09 | 77.42 | -0.237 | cyto |
| CcCYP87A2 | IMPTCCH1N18770_1 | 160 | 17416.9 | 4.61 | 53.33 | 74.81 | 0.076 | cyto |
| CcCYP87A3 | IMPTCCH1N81007_1 | 132 | 14652.97 | 8.46 | 28.15 | 67.27 | 0.081 | extr |
| CcCYP87A4 | IMPTCCH1N110969_1 | 163 | 18496.6 | 9.19 | 30.38 | 78.28 | -0.131 | pero |
| CcCYP87A5 | IMPTCCH1N109941_1 | 155 | 17661.59 | 8.49 | 51.47 | 89.94 | 0.066 | cyto |
| CcCYP87A6 | IMPTCCH1N114989_1 | 237 | 26883.26 | 5.42 | 39.73 | 92.11 | 0.035 | cyto |
| CcCYP90A2 | IMPTCCH1N32243_1 | 473 | 54188.15 | 8.58 | 36.84 | 88.18 | -0.111 | plas |
| CcCYP90A3 | IMPTCCH1N34002_1 | 472 | 53911.69 | 8.53 | 31.58 | 86.72 | -0.147 | plas |
| CcCYP90A4 | IMPTCCH1N25824_1 | 467 | 54018.71 | 9.06 | 43.96 | 88.5 | -0.21 | chlo |
| CcCYP87A7 | IMPTCCH1N21542_1 | 214 | 24149.85 | 7.06 | 34.73 | 91.17 | -0.055 | E.R. |
| CcCYP90B1 | IMPTCCH1N86750_1 | 480 | 54615.29 | 8.83 | 40.75 | 88.19 | -0.208 | chlo |
| CcCYP90A5 | IMPTCCH1N32391_1 | 478 | 54938.94 | 8.95 | 36.32 | 85.27 | -0.258 | chlo |
| CcCYP85A1 | IMPTCCH1N43212_1 | 460 | 52538.05 | 9.1 | 44.34 | 88.13 | -0.272 | chlo |
| CcCYP90C1 | IMPTCCH1N103653_1 | 484 | 55471.99 | 8.95 | 40.94 | 93.35 | -0.142 | chlo |
| CcCYP90A6 | IMPTCCH1N20796_1 | 438 | 50248.43 | 9.09 | 55.41 | 89.45 | -0.255 | cyto |
| Gene name | Gene ID | Amino acids（aa） | Molecular weight（Da） | Theoretical isoelectric point | Unstability coefficient | Aliphatic coefficient | Hydrophilicity | Subcellular localization prediction |
| CcCYP88A1 | IMPTCCH1N118133_1 | 369 | 41604.08 | 8.89 | 35.24 | 89.3 | -0.282 | cyto |
| CcCYP88A2 | IMPTCCH1N121841_1 | 441 | 49667.69 | 8.97 | 33.16 | 91.72 | -0.103 | chlo |
| CcCYP88A3 | IMPTCCH1N114184_1 | 481 | 55056.86 | 9.1 | 38.43 | 90.17 | -0.201 | cyto |
| CcCYP88A4 | IMPTCCH1N124627_1 | 407 | 46807.09 | 9.4 | 39.55 | 89.8 | -0.217 | E.R._plas |
| CcCYP88A5 | IMPTCCH1N22643_1 | 462 | 53153.83 | 9.24 | 42.35 | 87.53 | -0.235 | chlo |
| CcCYP90A7 | IMPTCCH1N16781_1 | 475 | 53914.13 | 9.3 | 46.71 | 89.66 | -0.218 | chlo |
| CcCYP90A8 | IMPTCCH1N37951_1 | 476 | 54116.4 | 9.31 | 39.38 | 97.46 | -0.008 | chlo |
| CcCYP90A9 | IMPTCCH1N60927_1 | 476 | 53896.15 | 9.45 | 45.84 | 95.21 | -0.021 | chlo |
| CcCYP90A10 | IMPTCCH1N62037_1 | 479 | 54383.9 | 9.59 | 43.87 | 97.04 | 0.013 | plas |
| CcCYP718A1 | IMPTCCH1N34781_1 | 382 | 43867.27 | 8.71 | 41.27 | 91.68 | -0.203 | pero |
| CcCYP90A11 | IMPTCCH1N33183_1 | 490 | 55438.91 | 9.08 | 29.8 | 96.49 | -0.091 | E.R. |
| CcCYP90A12 | IMPTCCH1N34880_1 | 491 | 55610.18 | 9.04 | 38.39 | 95.7 | -0.049 | chlo |
| CcCYP90A13 | IMPTCCH1N39052_1 | 480 | 54960.57 | 8.86 | 35.11 | 96.23 | -0.089 | chlo |
| CcCYP98A2 | IMPTCCH1N103818_1 | 156 | 18065.21 | 8.17 | 26.75 | 73.59 | -0.056 | cyto |
| CcCYP716A1 | IMPTCCH1N81887_1 | 249 | 28451.67 | 5.09 | 46.14 | 79.12 | -0.344 | cysk |
| CcCYP716A2 | IMPTCCH1N81639_1 | 439 | 49736.91 | 6.38 | 39.85 | 90.82 | -0.134 | chlo |
| Gene name | Gene ID | Amino acids（aa） | Molecular weight（Da） | Theoretical isoelectric point | Unstability coefficient | Aliphatic coefficient | Hydrophilicity | Subcellular localization prediction |
| CcCYP90A14 | IMPTCCH1N37168_1 | 497 | 56223.63 | 8.92 | 38.06 | 90.22 | -0.161 | chlo |
| CcCYP90A15 | IMPTCCH1N57270_1 | 436 | 50035.28 | 8 | 33.55 | 89.4 | -0.038 | cyto |
| CcCYP90A16 | IMPTCCH1N116756_1 | 474 | 55150.27 | 8.8 | 42.33 | 82.62 | -0.236 | chlo |
| CcCYP90A17 | IMPTCCH1N58886_1 | 488 | 55256.68 | 8.87 | 49.49 | 90.94 | -0.129 | plas |
| CcCYP90A18 | IMPTCCH1N57749_1 | 502 | 56875.4 | 8.93 | 44.68 | 89.12 | -0.13 | chlo |
| CcCYP51G1 | IMPTCCH1N122147_1 | 487 | 55342.99 | 8.13 | 42.91 | 95.07 | -0.146 | chlo |
| CcCYP51G2 | IMPTCCH1N110403_1 | 501 | 57141.74 | 8.23 | 42.74 | 91.68 | -0.105 | vacu |
| CcCYP72A1 | IMPTCCH1N120323_1 | 465 | 53585.46 | 8.6 | 48.05 | 91.2 | -0.201 | extr |
| CcCYP72A2 | IMPTCCH1N20296_1 | 228 | 26287.54 | 5.78 | 44.39 | 82.94 | -0.172 | cysk |
| CcCYP72A3 | IMPTCCH1N25465_1 | 215 | 24990.29 | 6.45 | 43.29 | 84.37 | -0.103 | cyto |
| CcCYP72A4 | IMPTCCH1N69427_1 | 517 | 59524.46 | 8.98 | 37.37 | 91.99 | -0.168 | chlo |
| CcCYP72A5 | IMPTCCH1N71241_1 | 153 | 17464.56 | 9.36 | 48 | 96.27 | 0.029 | cyto |
| CcCYP72A6 | IMPTCCH1N60203_1 | 482 | 55183.49 | 9.09 | 42.05 | 95.25 | -0.091 | chlo |
| CcCYP72A7 | IMPTCCH1N22939_1 | 117 | 13396.57 | 6.58 | 41.31 | 109.23 | -0.155 | golg |
| CcCYP72A8 | IMPTCCH1N15001_1 | 647 | 75375.62 | 9.26 | 43.7 | 86.82 | -0.366 | chlo |
| Gene name | Gene ID | Amino acids（aa） | Molecular weight（Da） | Theoretical isoelectric point | Unstability coefficient | Aliphatic coefficient | Hydrophilicity | Subcellular localization prediction |
| CcCYP72A9 | IMPTCCH1N118808_1 | 678 | 78707.1 | 8.83 | 41.16 | 90.46 | -0.348 | chlo |
| CcCYP72A10 | IMPTCCH1N77414_1 | 519 | 59773.08 | 9.34 | 44.45 | 95.65 | -0.16 | plas |
| CcCYP72A11 | IMPTCCH1N64295_1 | 519 | 59773.08 | 9.34 | 44.45 | 95.65 | -0.16 | plas |
| CcCYP72A12 | IMPTCCH1N35243_1 | 178 | 20132.7 | 6.59 | 52.69 | 109.55 | 0.165 | cyto |
| CcCYP72A13 | IMPTCCH1N8364_1 | 139 | 15536.41 | 8.73 | 43.66 | 116.4 | 0.178 | chlo |
| CcCYP72A14 | IMPTCCH1N87923_1 | 471 | 54166.42 | 9.21 | 46.79 | 92.91 | -0.096 | plas |
| CcCYP72A15 | IMPTCCH1N86736_1 | 518 | 59361.32 | 8.47 | 36.86 | 92.57 | -0.097 | chlo |
| CcCYP72A16 | IMPTCCH1N83843_1 | 518 | 59399.39 | 8.61 | 36.16 | 92.93 | -0.096 | chlo |
| CcCYP72A17 | IMPTCCH1N94238_1 | 459 | 52915.63 | 8.78 | 44.53 | 90.04 | -0.217 | cyto |
| CcCYP72A18 | IMPTCCH1N31563_1 | 494 | 56578.35 | 9.1 | 45.49 | 91.96 | -0.11 | chlo |
| CcCYP734A1 | IMPTCCH1N110888_1 | 502 | 58024.55 | 9.25 | 43.13 | 92.49 | -0.184 | vacu |
| CcCYP734A2 | IMPTCCH1N73989_1 | 536 | 61203.38 | 9.15 | 38.01 | 90.43 | -0.118 | chlo |
| CcCYP72A19 | IMPTCCH1N62810_1 | 268 | 30338.03 | 6.76 | 34.31 | 94.25 | -0.217 | cyto |
| CcCYP72A220 | IMPTCCH1N59227_1 | 291 | 33181.99 | 5.81 | 37.53 | 87.39 | -0.279 | cyto |
| CcCYP72A21 | IMPTCCH1N54172_1 | 514 | 59276.27 | 9.4 | 40.42 | 94.07 | -0.25 | chlo |
| Gene name | Gene ID | Amino acids（aa） | Molecular weight（Da） | Theoretical isoelectric point | Unstability coefficient | Aliphatic coefficient | Hydrophilicity | Subcellular localization prediction |
| CcCYP715A1 | IMPTCCH1N69138_1 | 518 | 59230.01 | 8.83 | 39.53 | 87.1 | -0.099 | chlo |
| CcCYP714A1 | IMPTCCH1N26998_1 | 446 | 50730.63 | 9.35 | 40.8 | 99.39 | 0.009 | chlo |
| CcCYP714A2 | IMPTCCH1N31973_1 | 456 | 51527.08 | 9.23 | 41.28 | 94.04 | -0.15 | cyto |
| CcCYP714A3 | IMPTCCH1N51352_1 | 373 | 42389.47 | 8.93 | 40.87 | 92.57 | -0.043 | chlo |
| CcCYP714A4 | IMPTCCH1N49669_1 | 431 | 48808.94 | 9.12 | 37.59 | 92.55 | -0.144 | chlo |
| CcCYP96A1 | IMPTCCH1N93175_1 | 226 | 25979.23 | 9.61 | 43.92 | 84.51 | -0.308 | cyto |
| CcCYP86A1 | IMPTCCH1N60868_1 | 506 | 57855.25 | 7.92 | 37.41 | 97.67 | -0.014 | chlo |
| CcCYP94C1 | IMPTCCH1N93757_1 | 176 | 20082.35 | 8.48 | 34.81 | 72.44 | -0.369 | cyto |
| CcCYP94C2 | IMPTCCH1N91168_1 | 170 | 19353.55 | 8.83 | 35.91 | 71.59 | -0.34 | cyto |
| CcCYP94C3 | IMPTCCH1N91838_1 | 138 | 15610.84 | 4.67 | 18.45 | 70.65 | -0.2 | cyto |
| CcCYP86A2 | IMPTCCH1N94053_1 | 509 | 57829.02 | 9.17 | 39 | 87.35 | -0.105 | chlo |
| CcCYP94C4 | IMPTCCH1N90362_1 | 121 | 14224.65 | 9.42 | 29.8 | 77.36 | -0.207 | cyto |
| CcCYP94C5 | IMPTCCH1N90794_1 | 121 | 14243.59 | 8.79 | 40.69 | 79.75 | -0.261 | cyto |
| CcCYP94C6 | IMPTCCH1N83187_1 | 368 | 42196.47 | 6.57 | 46.95 | 91.96 | -0.139 | chlo |
| CcCYP94C7 | IMPTCCH1N116981_1 | 401 | 45784.17 | 8.22 | 42.9 | 97.26 | -0.061 | chlo |
| Gene name | Gene ID | Amino acids（aa） | Molecular weight（Da） | Theoretical isoelectric point | Unstability coefficient | Aliphatic coefficient | Hydrophilicity | Subcellular localization prediction |
| CcCYP86A3 | IMPTCCH1N21419_1 | 481 | 54575.39 | 8.78 | 42.04 | 87.98 | -0.175 | chlo |
| CcCYP94C8 | IMPTCCH1N43019_1 | 409 | 45998.37 | 9.02 | 46.96 | 90.32 | -0.029 | chlo |
| CcCYP94C9 | IMPTCCH1N69928_1 | 166 | 18810.27 | 9.62 | 51.39 | 90.42 | 0.017 | chlo |
| CcCYP86A4 | IMPTCCH1N32722_1 | 456 | 51826.2 | 8.23 | 49.37 | 84.85 | -0.239 | chlo |
| CcCYP86B1 | IMPTCCH1N116130_1 | 513 | 59535.49 | 8.05 | 40.87 | 83.66 | -0.195 | chlo |
| CcCYP86C1 | IMPTCCH1N81854_1 | 117 | 13494.79 | 9.08 | 35.48 | 102.39 | -0.279 | nucl |
| CcCYP86A5 | IMPTCCH1N112826_1 | 123 | 14083.76 | 9.32 | 44.39 | 98.29 | -0.147 | cyto |
| CcCYP86A6 | IMPTCCH1N8527_1 | 551 | 63761.02 | 8.41 | 36.24 | 94.26 | -0.153 | chlo |
| CcCYP86A7 | IMPTCCH1N119616_1 | 300 | 34824.59 | 9.36 | 42.29 | 86.77 | -0.315 | cyto |
| CcCYP86A8 | IMPTCCH1N113754_1 | 292 | 33965.93 | 9.29 | 37.5 | 89.11 | 0.041 | extr |
| CcCYP86A9 | IMPTCCH1N71669_1 | 554 | 62781.36 | 7.95 | 39.97 | 94.69 | -0.126 | chlo |
| CcCYP86A11 | IMPTCCH1N29237_1 | 513 | 58269.06 | 9 | 38.31 | 88.23 | -0.158 | chlo |
| CcCYP86A12 | IMPTCCH1N79718_1 | 510 | 58586.59 | 8.27 | 36.48 | 92.92 | -0.092 | chlo |
| CcCYP86A13 | IMPTCCH1N65277_1 | 458 | 52879.57 | 6.31 | 27.79 | 83.47 | -0.239 | plas |
| CcCYP86A14 | IMPTCCH1N72215_1 | 512 | 58950.68 | 7.12 | 27.17 | 87.03 | -0.256 | chlo |
| Gene name | Gene ID | Amino acids（aa） | Molecular weight（Da） | Theoretical isoelectric point | Unstability coefficient | Aliphatic coefficient | Hydrophilicity | Subcellular localization prediction |
| CcCYP86A15 | IMPTCCH1N95175_1 | 515 | 59351.32 | 9.16 | 30.39 | 78.23 | -0.296 | chlo |
| CcCYP86A16 | IMPTCCH1N87110_1 | 515 | 59385.27 | 9.1 | 29.69 | 77.09 | -0.331 | chlo |
| CcCYP86A17 | IMPTCCH1N58642_1 | 506 | 58412.55 | 9.06 | 32.94 | 79.76 | -0.278 | chlo |
| CcCYP86A18 | IMPTCCH1N105426_1 | 509 | 58318.08 | 6.75 | 30.86 | 85.66 | -0.18 | chlo |
| CcCYP86A19 | IMPTCCH1N68321_1 | 502 | 57699.44 | 8.71 | 35.64 | 85.5 | -0.224 | chlo |
| CcCYP711A1 | IMPTCCH1N76419_1 | 538 | 61287.14 | 9.1 | 44.03 | 92.97 | -0.164 | chlo |
| CcCYP77A1 | IMPTCCH1N10131_1 | 511 | 58313.46 | 8.06 | 39.94 | 94.62 | -0.187 | chlo |
| CcCYP77A2 | IMPTCCH1N51384_1 | 507 | 56909.22 | 8.84 | 35 | 89.61 | -0.074 | plas |
| CcCYP77A3 | IMPTCCH1N33206_1 | 511 | 56886.87 | 9.33 | 43.65 | 91.76 | -0.057 | chlo |
| CcCYP71A1 | IMPTCCH1N82997_1 | 495 | 55800.81 | 7.74 | 41.67 | 99.27 | -0.047 | nucl |
| CcCYP71A2 | IMPTCCH1N72444_1 | 405 | 45545.06 | 8.47 | 33.34 | 99.95 | -0.007 | nucl |
| CcCYP71A3 | IMPTCCH1N124445_1 | 537 | 61090.16 | 8.18 | 43.35 | 101.51 | 0.031 | chlo |
| CcCYP71A4 | IMPTCCH1N115071_1 | 513 | 57988.5 | 7.76 | 41.65 | 101.33 | 0.028 | chlo |
| CcCYP71A5 | IMPTCCH1N70736_1 | 417 | 47767.72 | 8.7 | 37.52 | 93.72 | -0.224 | chlo |
| CcCYP71A6 | IMPTCCH1N56290_1 | 497 | 56971.01 | 6.63 | 38.67 | 100.78 | -0.217 | chlo |
| Gene name | Gene ID | Amino acids（aa） | Molecular weight（Da） | Theoretical isoelectric point | Unstability coefficient | Aliphatic coefficient | Hydrophilicity | Subcellular localization prediction |
| CcCYP71A7 | IMPTCCH1N24950_1 | 125 | 14486.78 | 5.32 | 43.6 | 90.48 | -0.139 | cyto |
| CcCYP71A8 | IMPTCCH1N40482_1 | 499 | 57081.27 | 8.21 | 38.6 | 92.71 | -0.155 | chlo |
| CcCYP71A9 | IMPTCCH1N65856_1 | 446 | 50852.9 | 7.24 | 39.42 | 91.55 | -0.143 | cysk |
| CcCYP71A10 | IMPTCCH1N68697_1 | 481 | 54658.13 | 6.37 | 36.38 | 90.37 | -0.147 | chlo |
| CcCYP71A11 | IMPTCCH1N13247_1 | 516 | 58672.16 | 7.25 | 41.04 | 97.23 | -0.03 | chlo |
| CcCYP71A12 | IMPTCCH1N44786_1 | 509 | 58242.52 | 6.26 | 37.21 | 101.08 | -0.114 | plas |
| CcCYP71A13 | IMPTCCH1N19867_1 | 175 | 20061.13 | 6.84 | 44.51 | 84.63 | -0.34 | cyto |
| CcCYP71A14 | IMPTCCH1N24186_1 | 521 | 59177.08 | 8.83 | 43.61 | 103.84 | -0.017 | plas |
| CcCYP71A15 | IMPTCCH1N42869_1 | 519 | 59579.77 | 6.23 | 42 | 95.2 | -0.197 | chlo |
| CcCYP71A16 | IMPTCCH1N50269_1 | 537 | 61323.84 | 6.51 | 43.88 | 95.29 | -0.189 | chlo |
| CcCYP71A17 | IMPTCCH1N24923_1 | 506 | 57829.39 | 6.48 | 40.71 | 100.89 | 0.045 | plas |
| CcCYP84A1 | IMPTCCH1N107455_1 | 511 | 57887.04 | 7.18 | 39.21 | 95.79 | -0.089 | chlo |
| CcCYP84A2 | IMPTCCH1N24387_1 | 511 | 57444.09 | 6.4 | 42.22 | 88.16 | -0.127 | chlo |
| CcCYP71A18 | IMPTCCH1N40401_1 | 455 | 51526.33 | 6.12 | 36.15 | 108.44 | 0.07 | plas |
| CcCYP71A19 | IMPTCCH1N52396_1 | 423 | 48497.9 | 8.76 | 35.04 | 102.39 | -0.071 | chlo |
| Gene name | Gene ID | Amino acids（aa） | Molecular weight（Da） | Theoretical isoelectric point | Unstability coefficient | Aliphatic coefficient | Hydrophilicity | Subcellular localization prediction |
| CcCYP71A20 | IMPTCCH1N50376_1 | 511 | 57856.74 | 8.15 | 42.75 | 104.15 | 0.086 | plas |
| CcCYP71A21 | IMPTCCH1N48551_1 | 507 | 57174.87 | 6.77 | 39.19 | 106.17 | 0.076 | chlo |
| CcCYP71A22 | IMPTCCH1N46286_1 | 518 | 58327.22 | 6.74 | 39.31 | 102.03 | 0.043 | chlo |
| CcCYP71A23 | IMPTCCH1N52252_1 | 478 | 54009.08 | 8.48 | 35.8 | 102.99 | 0.001 | chlo |
| CcCYP71A24 | IMPTCCH1N49820_1 | 471 | 53317.96 | 6.03 | 33.12 | 97.92 | -0.087 | cyto |
| CcCYP71A25 | IMPTCCH1N52000_1 | 471 | 53390.07 | 6.12 | 34.25 | 97.92 | -0.085 | cysk |
| CcCYP71A26 | IMPTCCH1N1181_1 | 512 | 58120.01 | 6.64 | 36.11 | 104.12 | 0.033 | chlo |
| CcCYP71A27 | IMPTCCH1N73615_1 | 472 | 53585.72 | 6.61 | 36.17 | 104.89 | 0.021 | chlo |
| CcCYP71A28 | IMPTCCH1N79743_1 | 469 | 52667.04 | 6.96 | 35.83 | 96.87 | -0.119 | cyto |
| CcCYP71A29 | IMPTCCH1N1645_1 | 504 | 57238.94 | 6.8 | 31.69 | 105.77 | 0.05 | chlo |
| CcCYP71A30 | IMPTCCH1N5076_1 | 478 | 54078.93 | 6.51 | 37.64 | 103.6 | -0.089 | vacu |
| CcCYP71A31 | IMPTCCH1N24864_1 | 502 | 57588.53 | 5.88 | 43.15 | 95.88 | -0.13 | vacu |
| CcCYP71A32 | IMPTCCH1N60231_1 | 505 | 57576.73 | 6.37 | 37.75 | 94.61 | -0.17 | chlo |
| CcCYP71A33 | IMPTCCH1N55041_1 | 426 | 48238.82 | 6.39 | 35.48 | 94.51 | -0.127 | chlo |
| CcCYP71A34 | IMPTCCH1N53943_1 | 513 | 58682.2 | 6.48 | 37.5 | 96.16 | -0.153 | chlo |
| Gene name | Gene ID | Amino acids（aa） | Molecular weight（Da） | Theoretical isoelectric point | Unstability coefficient | Aliphatic coefficient | Hydrophilicity | Subcellular localization prediction |
| CcCYP71A35 | IMPTCCH1N122357_1 | 509 | 58307.95 | 8.75 | 41.33 | 93.24 | -0.181 | chlo |
| CcCYP82C1 | IMPTCCH1N41070_1 | 473 | 53352.93 | 7.69 | 31.66 | 94.59 | -0.101 | vacu |
| CcCYP82C2 | IMPTCCH1N49191_1 | 520 | 58653.21 | 8.7 | 33.1 | 95.42 | -0.062 | plas |
| CcCYP82C3 | IMPTCCH1N50002_1 | 524 | 59311.17 | 8.82 | 36.79 | 97.54 | -0.048 | plas |
| CcCYP82C4 | IMPTCCH1N46792_1 | 592 | 66560.96 | 8.15 | 36.58 | 95.37 | -0.142 | chlo |
| CcCYP82C5 | IMPTCCH1N48640_1 | 523 | 59235.15 | 8.98 | 32.07 | 95.97 | 0.007 | chlo |
| CcCYP82C6 | IMPTCCH1N88535_1 | 518 | 58939.38 | 8.28 | 39.52 | 98.67 | -0.123 | chlo |
| CcCYP82C7 | IMPTCCH1N92612_1 | 523 | 59087.82 | 8.65 | 31.81 | 98.24 | -0.036 | plas |
| CcCYP82C8 | IMPTCCH1N89880_1 | 522 | 58944.35 | 8.32 | 33.73 | 95.82 | -0.089 | plas |
| CcCYP82C9 | IMPTCCH1N89787_1 | 474 | 53681.98 | 7.21 | 34.71 | 92.38 | -0.197 | cyto |
| CcCYP82C10 | IMPTCCH1N91971_1 | 523 | 59477.37 | 8.34 | 38.61 | 99.54 | -0.063 | plas |
| CcCYP82C11 | IMPTCCH1N123164_1 | 524 | 58947.33 | 8.85 | 33.89 | 97.16 | -0.008 | E.R. |
| CcCYP82C12 | IMPTCCH1N22477_1 | 525 | 59110.58 | 9.12 | 34.45 | 98.06 | -0.013 | plas |
| CcCYP82C13 | IMPTCCH1N13970_1 | 529 | 59910.23 | 8.72 | 42.14 | 93.8 | -0.192 | chlo |
| CcCYP82C14 | IMPTCCH1N14329_1 | 530 | 59972.59 | 9.05 | 44.12 | 94.94 | -0.155 | chlo |
| Gene name | Gene ID | Amino acids（aa） | Molecular weight（Da） | Theoretical isoelectric point | Unstability coefficient | Aliphatic coefficient | Hydrophilicity | Subcellular localization prediction |
| CcCYP82C15 | IMPTCCH1N22647_1 | 530 | 60275.67 | 6.98 | 42.91 | 91.43 | -0.214 | chlo |
| CcCYP82C16 | IMPTCCH1N79772_1 | 530 | 60031.51 | 8.65 | 40.55 | 92.68 | -0.16 | chlo |
| CcCYP82C17 | IMPTCCH1N16261_1 | 542 | 60575.76 | 7.25 | 27.83 | 90.61 | -0.158 | vacu |
| CcCYP82C18 | IMPTCCH1N73202_1 | 542 | 60589.74 | 8.07 | 29.33 | 88.27 | -0.204 | vacu |
| CcCYP82C19 | IMPTCCH1N8005_1 | 542 | 60764.91 | 7.67 | 30.36 | 88.45 | -0.211 | vacu |
| CcCYP82C20 | IMPTCCH1N103982_1 | 557 | 62532.25 | 6.69 | 30.35 | 83.63 | -0.313 | chlo |
| CcCYP82C21 | IMPTCCH1N23071_1 | 551 | 61645.42 | 6.64 | 32.42 | 86.12 | -0.293 | chlo |
| CcCYP82C22 | IMPTCCH1N62979_1 | 545 | 61429.66 | 7.66 | 31.56 | 87.63 | -0.205 | chlo |
| CcCYP82C23 | IMPTCCH1N112603_1 | 528 | 59520.72 | 6.75 | 35.25 | 94.72 | -0.151 | chlo |
| CcCYP82C24 | IMPTCCH1N97241_1 | 534 | 61187.5 | 8.61 | 44.43 | 96.18 | -0.103 | chlo |
| CcCYP82C25 | IMPTCCH1N81628_1 | 496 | 56721.96 | 7.14 | 40.59 | 95.69 | -0.153 | cyto |
| CcCYP82C26 | IMPTCCH1N96417_1 | 555 | 63710.27 | 8.8 | 44.64 | 95.14 | -0.13 | plas |
| CcCYP811 | IMPTCCH1N103848_1 | 505 | 58023.69 | 9.11 | 46.96 | 96.12 | -0.139 | chlo |
| CcCYP812 | IMPTCCH1N100898_1 | 505 | 58110.81 | 9.22 | 46.08 | 95.72 | -0.158 | chlo |
| CcCYP813 | IMPTCCH1N56523_1 | 240 | 26817.05 | 5.8 | 34.33 | 86.54 | -0.101 | cyto |
| Gene name | Gene ID | Amino acids（aa） | Molecular weight（Da） | Theoretical isoelectric point | Unstability coefficient | Aliphatic coefficient | Hydrophilicity | Subcellular localization prediction |
| CcCYP814 | IMPTCCH1N81765_1 | 518 | 59912.16 | 9.2 | 39.82 | 92.76 | -0.156 | E.R. |
| CcCYP815 | IMPTCCH1N27019_1 | 450 | 51391.13 | 7.9 | 46.06 | 90.33 | -0.16 | chlo |
| CcCYP816 | IMPTCCH1N111076_1 | 268 | 30288.84 | 5.48 | 41.11 | 92.76 | -0.27 | pero |
| CcCYP817 | IMPTCCH1N25380_1 | 508 | 58531.79 | 8.94 | 56.41 | 100.37 | -0.038 | chlo |
| CcCYP818 | IMPTCCH1N19956_1 | 206 | 23113.68 | 5.68 | 46.08 | 85.63 | -0.12 | cyto |
| CcCYP819 | IMPTCCH1N18298_1 | 506 | 57717.3 | 8.48 | 43.63 | 95.79 | -0.038 | plas |
| CcCYP8110 | IMPTCCH1N107390_1 | 506 | 57835.91 | 7.2 | 49.02 | 94.17 | -0.159 | chlo |
| CcCYP8111 | IMPTCCH1N103226_1 | 251 | 27773.04 | 5.09 | 45.84 | 94.38 | -0.091 | cyto |
| CcCYP8112 | IMPTCCH1N110213_1 | 245 | 27325.65 | 6.38 | 40.8 | 89.92 | -0.123 | chlo |
| CcCYP8113 | IMPTCCH1N103499_1 | 507 | 58127.8 | 8.3 | 50.05 | 94.75 | -0.223 | chlo |
| CcCYP8114 | IMPTCCH1N109543_1 | 507 | 58225.91 | 8.3 | 50.01 | 94.18 | -0.231 | chlo |
| CcCYP8115 | IMPTCCH1N106598_1 | 503 | 56704.18 | 8.35 | 42.53 | 101.73 | -0.068 | plas |
| CcCYP8116 | IMPTCCH1N110948_1 | 503 | 56751.16 | 8.12 | 41.18 | 101.93 | -0.082 | plas |
| CcCYP93D1 | IMPTCCH1N48984_1 | 526 | 59528.17 | 6.93 | 44.85 | 101.22 | -0.058 | chlo |
| CcCYP93D2 | IMPTCCH1N17338_1 | 519 | 58418.2 | 8.85 | 42.01 | 98.44 | -0.018 | plas |
| Gene name | Gene ID | Amino acids（aa） | Molecular weight（Da） | Theoretical isoelectric point | Unstability coefficient | Aliphatic coefficient | Hydrophilicity | Subcellular localization prediction |
| CcCYP93D3 | IMPTCCH1N23305_1 | 519 | 58397.11 | 8.72 | 42.4 | 97.3 | -0.015 | plas |
| CcCYP93D4 | IMPTCCH1N64144_1 | 393 | 44218.68 | 5.92 | 42.59 | 82.88 | -0.338 | cyto |
| CcCYP93D5 | IMPTCCH1N17042_1 | 539 | 61077.89 | 8.42 | 31.3 | 101.63 | -0.098 | plas |
| CcCYP93D6 | IMPTCCH1N37852_1 | 517 | 58544.77 | 6.27 | 39.96 | 96.75 | -0.174 | plas |
| CcCYP93D7 | IMPTCCH1N63931_1 | 516 | 58136.17 | 5.97 | 37.92 | 99.79 | -0.105 | plas |
| CcCYP93D8 | IMPTCCH1N30539_1 | 518 | 59016.69 | 6.95 | 48.43 | 97.88 | -0.077 | plas |
| CcCYP712A1 | IMPTCCH1N112888_1 | 165 | 18466.27 | 6.5 | 47.1 | 80.85 | -0.16 | chlo |
| CcCYP93D9 | IMPTCCH1N3851_1 | 494 | 56235.16 | 8.62 | 40.15 | 93.08 | -0.136 | chlo |
| CcCYP93D10 | IMPTCCH1N41350_1 | 300 | 33626.08 | 6.99 | 40.33 | 102.6 | -0.115 | cyto |
| CcCYP79A1 | IMPTCCH1N19775_1 | 534 | 61011.15 | 6.48 | 45.61 | 94.18 | -0.252 | chlo |
| CcCYP79B1 | IMPTCCH1N100079_1 | 562 | 64196.14 | 8 | 44.78 | 96.09 | -0.19 | chlo |
| CcCYP75B1 | IMPTCCH1N11954_1 | 515 | 57354.76 | 8.11 | 34.22 | 96.04 | 0.048 | E.R. |
| CcCYP76C2 | IMPTCCH1N30568_1 | 557 | 62409.8 | 9.08 | 31.32 | 95.22 | -0.036 | chlo |
| CcCYP76C3 | IMPTCCH1N67611_1 | 539 | 61198.45 | 8.09 | 35.14 | 101.41 | 0.007 | E.R. |
| CcCYP706A1 | IMPTCCH1N69741_1 | 401 | 44547.23 | 8.94 | 35.14 | 95.81 | -0.007 | chlo |
| Gene name | Gene ID | Amino acids（aa） | Molecular weight（Da） | Theoretical isoelectric point | Unstability coefficient | Aliphatic coefficient | Hydrophilicity | Subcellular localization prediction |
| CcCYP75B2 | IMPTCCH1N48143_1 | 188 | 21554.46 | 9.82 | 46.89 | 103.67 | -0.039 | cyto |
| CcCYP75B3 | IMPTCCH1N30274_1 | 177 | 19796 | 6.29 | 25.63 | 98.02 | 0.061 | cyto |
| CcCYP75B4 | IMPTCCH1N48998_1 | 283 | 31734.49 | 9.07 | 32.59 | 82.33 | -0.391 | cyto |
| CcCYP76C4 | IMPTCCH1N67041_1 | 529 | 59416.14 | 6.58 | 26.7 | 92.27 | -0.025 | chlo |
| CcCYP76C5 | IMPTCCH1N75179_1 | 522 | 59011.66 | 8.38 | 39.12 | 96.19 | -0.019 | chlo |
| CcCYP706A2 | IMPTCCH1N97702_1 | 516 | 58328.45 | 8.63 | 33.71 | 91.63 | -0.162 | chlo |
| CcCYP706A3 | IMPTCCH1N21606_1 | 207 | 23288.95 | 6.96 | 37.51 | 91.35 | -0.208 | cyto |
| CcCYP706A4 | IMPTCCH1N22515_1 | 215 | 24229 | 5.55 | 43.5 | 88.33 | 0.012 | cyto |
| CcCYP76C6 | IMPTCCH1N25748_1 | 519 | 59000.1 | 8.89 | 39.98 | 95.22 | -0.059 | chlo |
| CcCYP706A5 | IMPTCCH1N5316_1 | 478 | 54183.54 | 8.06 | 41.51 | 102.91 | 0.013 | chlo |
| CcCYP76C7 | IMPTCCH1N78220_1 | 525 | 59959.03 | 7.22 | 41.87 | 102.95 | -0.048 | chlo |
| CcCYP76C8 | IMPTCCH1N66382_1 | 501 | 56788.13 | 8.35 | 32.77 | 97.23 | -0.072 | cyto |
| CcCYP706A6 | IMPTCCH1N79228_1 | 506 | 57742.8 | 8.82 | 35.2 | 95.18 | -0.098 | nucl |
| CcCYP76C9 | IMPTCCH1N81053_1 | 506 | 57568.31 | 9.01 | 37.12 | 95 | -0.148 | chlo |
| CcCYP76C10 | IMPTCCH1N75069_1 | 518 | 59058.33 | 8.51 | 31.61 | 104.03 | -0.031 | chlo |
| Gene name | Gene ID | Amino acids（aa） | Molecular weight（Da） | Theoretical isoelectric point | Unstability coefficient | Aliphatic coefficient | Hydrophilicity | Subcellular localization prediction |
| CcCYP76C11 | IMPTCCH1N70128_1 | 525 | 60183.03 | 8.33 | 31.83 | 97.66 | -0.18 | chlo |
| CcCYP76C12 | IMPTCCH1N6780_1 | 524 | 59994.92 | 8.52 | 36.3 | 96.49 | -0.143 | chlo |
| CcCYP76C13 | IMPTCCH1N113385_1 | 459 | 52669.91 | 6.74 | 45.13 | 97.49 | -0.157 | chlo |
| CcCYP76C14 | IMPTCCH1N123477_1 | 492 | 56095.06 | 6.87 | 43.41 | 101.06 | -0.08 | chlo |
| CcCYP76C15 | IMPTCCH1N10074_1 | 491 | 55514.49 | 6.75 | 38.74 | 103.28 | -0.006 | chlo |
| CcCYP76C16 | IMPTCCH1N7204_1 | 494 | 56372.67 | 8.67 | 42.56 | 97.15 | -0.111 | chlo |
| CcCYP76C17 | IMPTCCH1N62511_1 | 494 | 56147.28 | 8.35 | 38.64 | 92.02 | -0.113 | chlo |
| CcCYP76C18 | IMPTCCH1N48980_1 | 510 | 58143.12 | 8.11 | 42.81 | 88.69 | -0.291 | plas |
| CcCYP76C19 | IMPTCCH1N42864_1 | 510 | 58164.26 | 8.82 | 41.38 | 88.31 | -0.307 | cyto |
| CcCYP76C20 | IMPTCCH1N52069_1 | 510 | 58139.29 | 8.37 | 38.53 | 88.69 | -0.256 | chlo |
| CcCYP76C21 | IMPTCCH1N109375_1 | 510 | 57840.95 | 6.55 | 34.6 | 91.55 | -0.237 | chlo |
| CcCYP76C22 | IMPTCCH1N52103_1 | 508 | 57898.01 | 7.16 | 43.95 | 94.39 | -0.272 | chlo |
| CcCYP76C23 | IMPTCCH1N69452_1 | 515 | 58739 | 7.23 | 40.08 | 86.12 | -0.232 | chlo |
| CcCYP76C24 | IMPTCCH1N47676_1 | 511 | 58201.65 | 8.87 | 38.91 | 85.62 | -0.216 | chlo |
| CcCYP76C25 | IMPTCCH1N40770_1 | 511 | 58201.65 | 8.87 | 38.91 | 85.62 | -0.216 | chlo |
| Gene name | Gene ID | Amino acids（aa） | Molecular weight（Da） | Theoretical isoelectric point | Unstability coefficient | Aliphatic coefficient | Hydrophilicity | Subcellular localization prediction |
| CcCYP76C26 | IMPTCCH1N45303_1 | 515 | 58756.12 | 8.64 | 38.25 | 84.41 | -0.259 | chlo |
| CcCYP76C27 | IMPTCCH1N60417_1 | 368 | 42420.61 | 6.06 | 34.22 | 86.82 | -0.379 | chlo |
| CcCYP76C28 | IMPTCCH1N45542_1 | 426 | 49167.81 | 8.05 | 41.54 | 87.58 | -0.323 | cyto |
| CcCYP76C29 | IMPTCCH1N101014_1 | 483 | 54759.07 | 7.65 | 38.87 | 86.02 | -0.27 | cyto |
| CcCYP76C30 | IMPTCCH1N51019_1 | 470 | 53296.01 | 9.11 | 37.96 | 91.28 | -0.121 | chlo |
| CcCYP76C31 | IMPTCCH1N51533_1 | 480 | 54738.47 | 8.98 | 37.4 | 88.79 | -0.224 | chlo |
| CcCYP76C32 | IMPTCCH1N14551_1 | 508 | 57335.25 | 8.46 | 30.01 | 83.88 | -0.154 | chlo |
| CcCYP76C33 | IMPTCCH1N48565_1 | 516 | 58537.43 | 7.75 | 35.19 | 88.41 | -0.116 | chlo |
| CcCYP76C34 | IMPTCCH1N120866_1 | 441 | 49549.6 | 6.64 | 41.11 | 103.17 | -0.037 | plas |
| CcCYP76C35 | IMPTCCH1N69869_1 | 486 | 54944.26 | 8.37 | 44.3 | 99.51 | -0.072 | pero |
| CcCYP76C36 | IMPTCCH1N51025_1 | 335 | 37932.82 | 5.32 | 33.05 | 94.84 | -0.099 | plas |
| CcCYP76C37 | IMPTCCH1N74768_1 | 444 | 49892.71 | 7.13 | 35.87 | 97.95 | -0.146 | chlo |
| CcCYP76C38 | IMPTCCH1N66043_1 | 311 | 35120.41 | 5.63 | 40.21 | 94.37 | -0.249 | nucl |

Note: chlo: chloroplast; cysk: cytosk; cyto: cytoplasm; E.R.: Endoplasmic reticulum; E.R._plas: Endoplasmic reticulum–plasma membrane-related localization; extr: extracellular golg: Golgi apparatus; nucl: nucleus;

pero: peroxide; PLAS: plasma membrane; vacuole: vacuole
